# Supplementary material
Source: publisher figshare collection journal article supplement (https://acs.figshare.com/ndownloader/files/3847039)
Supplement: Supplementary file 1 [file 3847039]

# **PET of Follicle-Stimulating Hormone Receptor: Broad Applicability to Cancer Imaging**

**Hao Hong,<sup>1</sup> Yongjun Yan,<sup>1,2\*</sup> Sixiang Shi,<sup>3</sup> Stephen A. Graves,<sup>2</sup> Lazura K. Krasteva,<sup>4</sup> Robert J. Nickles,<sup>2</sup>  
Min Yang,<sup>5</sup> Weibo Cai<sup>1,4,6\*</sup>**

<sup>1</sup> Department of Radiology, University of Wisconsin - Madison, Wisconsin 53705-2275, United States

<sup>2</sup> Department of Medical Physics, University of Wisconsin - Madison, Wisconsin 53705-2275, United States

<sup>3</sup> Materials Science Program, University of Wisconsin - Madison, Wisconsin 53705-2275, United States

<sup>4</sup> Department of Biomedical Engineering, University of Wisconsin - Madison, Wisconsin 53705-2275, United States

<sup>5</sup> Key Laboratory of Nuclear Medicine, Ministry of Health, Jiangsu Key Laboratory of Molecular Nuclear Medicine, Jiangsu Institute of Nuclear Medicine, Wuxi, Jiangsu, 214063, China

<sup>6</sup> University of Wisconsin Carbone Cancer Center, Madison, Wisconsin 53705-2275, United States

\* (Y.Y.) Fax: 1-608-265-0614; Tel: 1-608-262-6153; E-mail: [yyan26@wisc.edu](mailto:yyan26@wisc.edu)

(W.C.) Fax: 1-608-265-0614; Tel: 1-608-262-1749; E-mail: [wcai@uwhealth.org](mailto:wcai@uwhealth.org)

## Materials and methods

### Cell Internalization and Efflux Assays

The radioactivity was measured using a Wizard<sup>2</sup> gamma-counter (Perkin-Elmer; energy window: 400 - 600 keV). FSHR-positive CAOV-3 cells ( $5 \times 10^6$ /mL) were incubated at 4 °C for 30 min with  $10^5$  cpm/mL of  $^{64}\text{Cu}$ -NOTA-FSHR-mAb. For cell internalization study, the cells were washed three times with cold HBSS and resuspended in complete medium at  $4 \times 10^6$ /mL. At serial time points (0.25, 0.5, 1, 1.5, 2, 2.5, and 3 h), 1 mL of the cell suspension was removed from the culture and centrifuged at  $14,000\times g$  for 15 s. The cell pellets were then resuspended in 0.5 mL of 0.01 M sodium citrate, 0.14 M NaCl, pH 2 buffer for 2 min at room temperature and then centrifuged at  $14,000\times g$  for 15 s. The amount of internalized proteins was calculated by the radioactivity that remained associated with the cells after the wash with pH 2 buffer. All data were presented as mean  $\pm$  SD using triplicate samples.

For cellular efflux studies, CAOV-3 cells ( $5 \times 10^6$ /mL) were incubated at 37 °C for 2 h with  $10^5$  cpm/mL of  $^{64}\text{Cu}$ -NOTA-FSHR-mAb. The cells were washed three times with cold HBSS and resuspended in complete medium at  $4 \times 10^6$ /mL. At serial time points (0.25, 0.5, 1, 1.5, 2, 2.5, and 3 h), 1 mL of the cell suspension was removed from the culture and centrifuged at  $14,000\times g$  for 15 s. The radioactivity in the supernatant represents the efflux of  $^{64}\text{Cu}$ -NOTA-FSHR-mAb from CAOV-3 cells at different time points. All data were presented as mean  $\pm$  SD using triplicate samples.

## Results

$^{64}\text{Cu}$ -NOTA-FSHR-mAb can be internalized rapidly by the cells at earliest time point (0.25 h) but the efflux rate is also significant after 0.5 h (**Figure S1**). More than 40% of intaken  $^{64}\text{Cu}$ -NOTA-FSHR-mAb was excreted from the CAOV-3 cells at 3 h post-incubation. Only less

than 30% of total  $^{64}\text{Cu}$ -NOTA-FSHR-mAb was taken inside the CAOV-3 (**Figure S1**), indicating that most of  $^{64}\text{Cu}$ -NOTA-FSHR-mAb stayed bound to the surface of CAOV-3 cells.

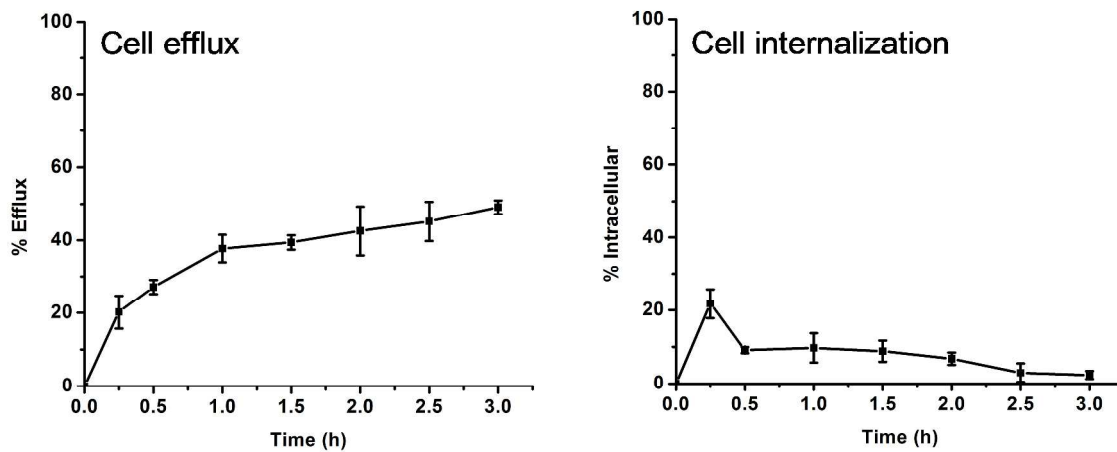

**Figure S1** Internalization and efflux of  $^{64}\text{Cu}$ -NOTA-FSHR-mAb in FSHR-positive CAOV-3 cells.
